# Supplementary material for: FRET imaging of calcium signaling in live cells in the microenvironment
Source: Royal Society of Chemistry journal article supplement (doi:10.1039/c2ib20264f), 2012-11-29
Supplement: c2ib20264f.pdf [file c2ib20264f.pdf]

Extracellular

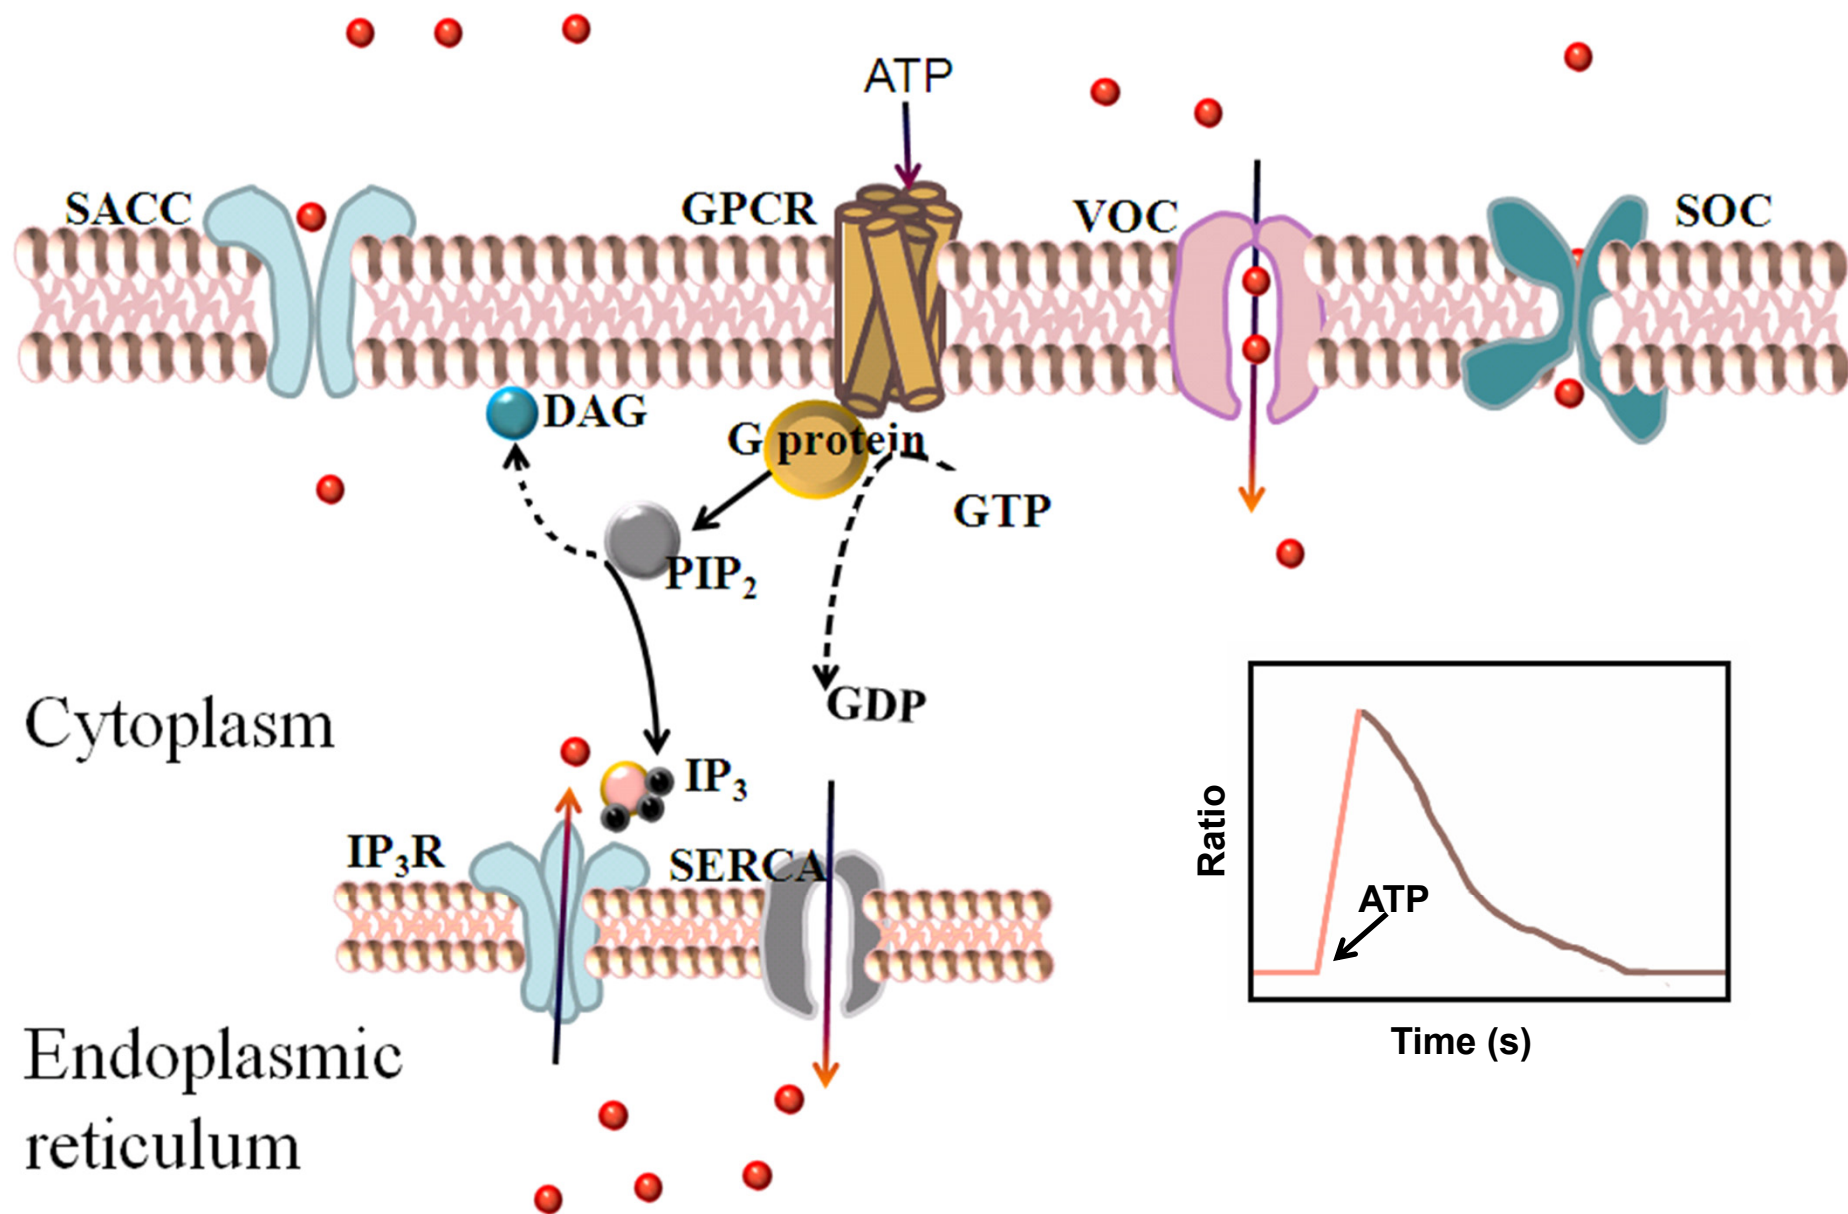

Cytoplasm

Endoplasmic reticulum

Figure S1

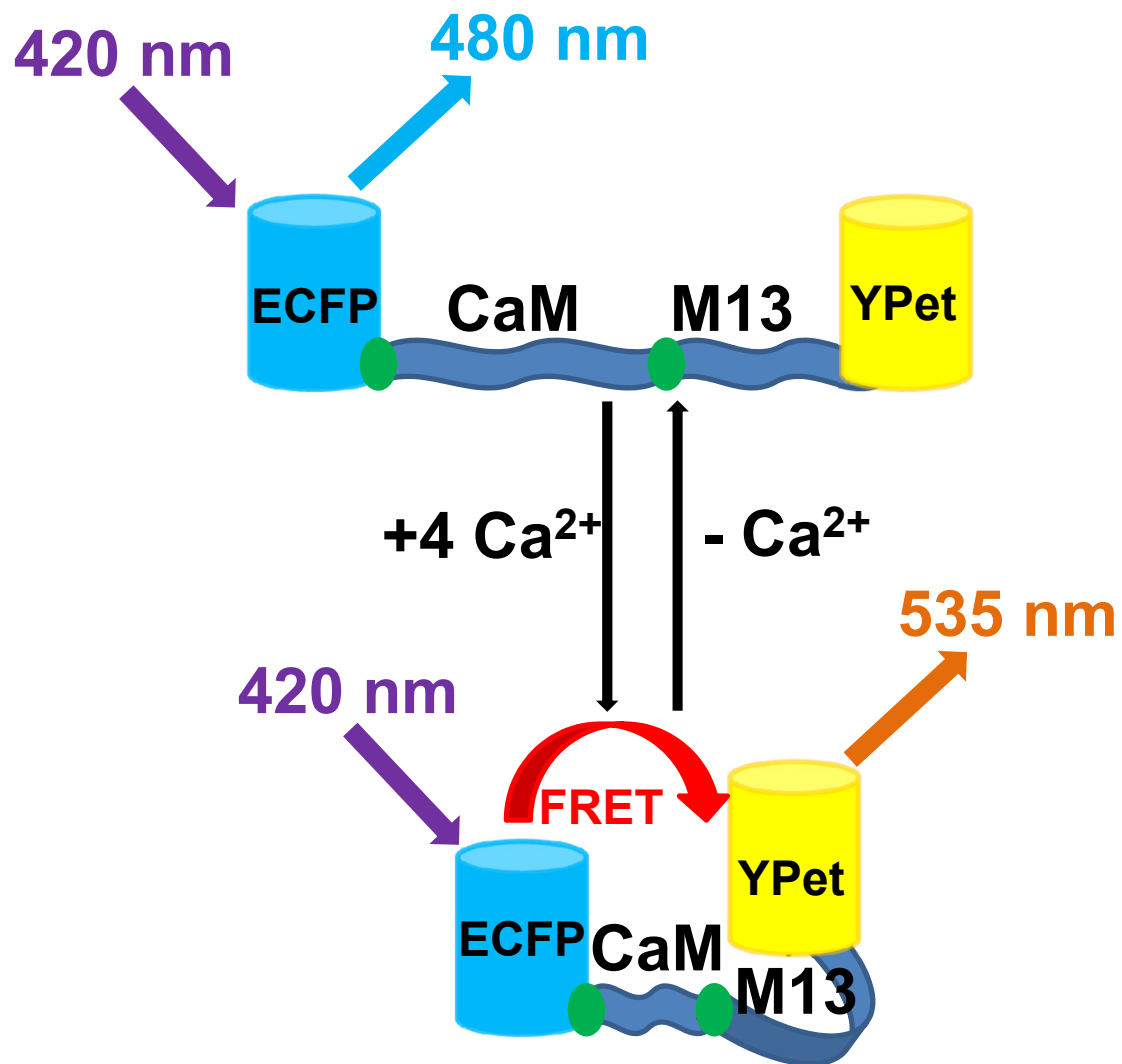

Figure S2

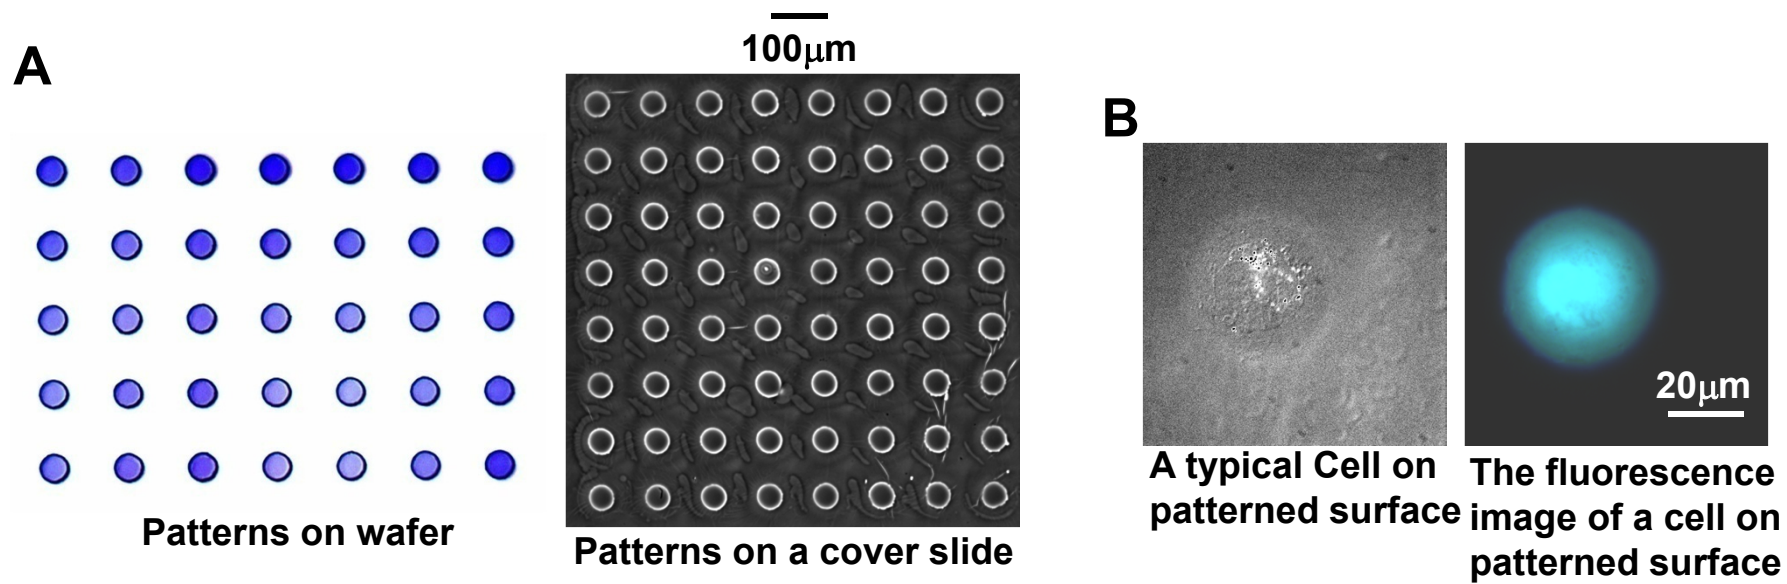

**Figure S3**

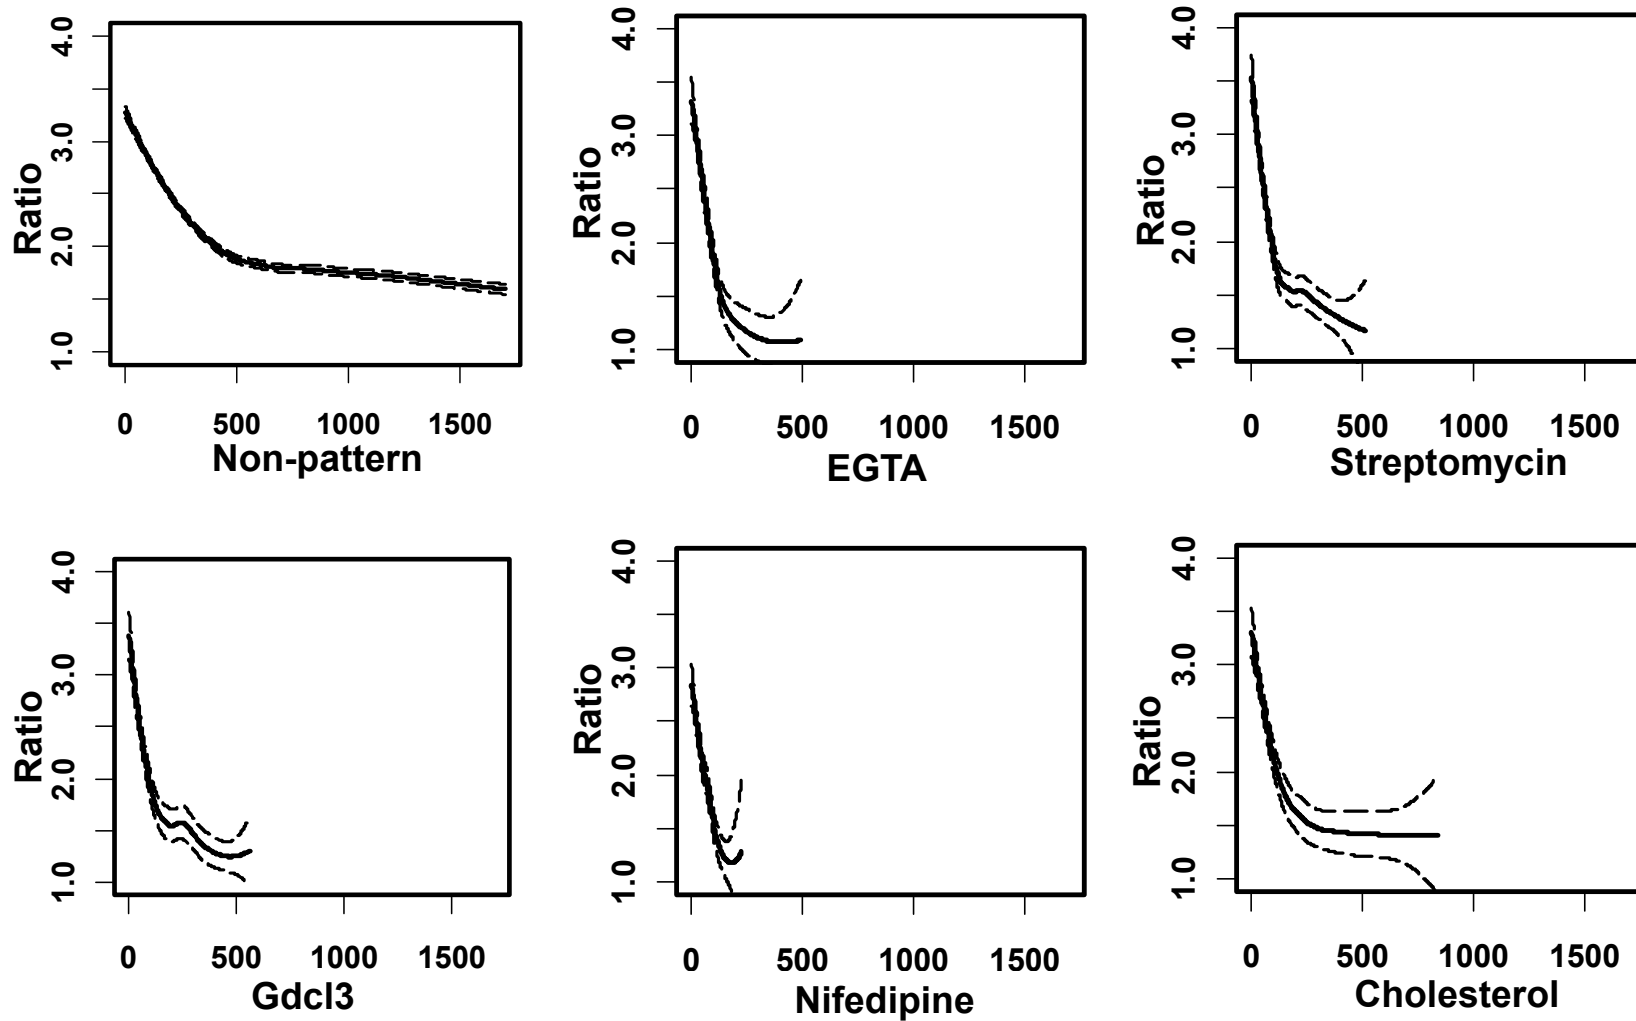

**Figure S4**

**Two connecting cells on  
non-patterned surface**

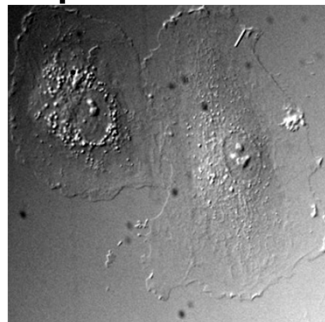

**Two connecting cells  
on patterned surface**

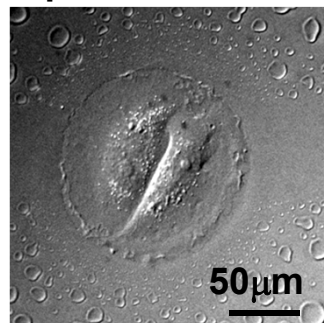

**Figure S5**
